# Supplementary material for: Temperature dependent Raman study of antiferromagnetic CrPS4
Source: Royal Society of Chemistry journal article supplement (doi:10.1039/d4tc01201a), 2024-01-01
Supplement: d4tc01201a1.pdf [file d4tc01201a1.pdf]

## **Supplementary information**

# Temperature dependent Raman study of antiferromagnetic CrPS<sub>4</sub>

*Manh Hong Nguyen<sup>1</sup>, Suhan Son<sup>2</sup>, Giung Park<sup>2</sup>, Woongki Na<sup>1</sup>, Je-Geun Park<sup>2\*</sup> and Hyeonsik  
Cheong<sup>1\*</sup>*

*<sup>1</sup>Department of Physics, Sogang University, Seoul 04107, Korea*

*<sup>2</sup>Department of Physics and Astronomy, Seoul National University, Seoul 08826, Korea*

**\*Corresponding-author email:** [jgpark10@snu.ac.kr](mailto:jgpark10@snu.ac.kr), [hcheong@sogang.ac.kr](mailto:hcheong@sogang.ac.kr)

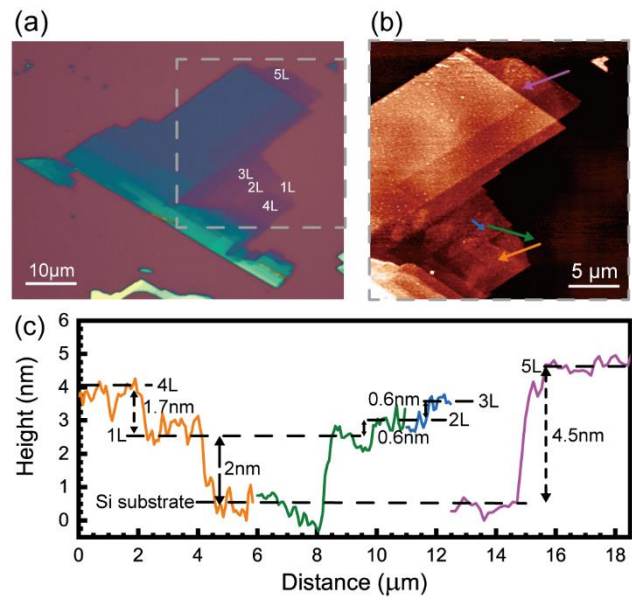

**Figure S1.** (a) Optical image and (b) AFM image of a few-layer CrPS<sub>4</sub> sample. (c) Height profiles measured along the lines indicated in (b).

**Table S1.** Comparison of Raman peaks measured at 293 K with calculated phonon modes of bulk CrPS<sub>4</sub>.

| Our work   |                               | Theoretical work by S. N. Neal <i>et al.</i> <sup>1</sup> |                                                                            |
|------------|-------------------------------|-----------------------------------------------------------|----------------------------------------------------------------------------|
| Peak label | Frequency (cm <sup>-1</sup> ) | Frequency (cm <sup>-1</sup> )                             | Vibrational motion                                                         |
| B1         | 86.0                          | 78.3                                                      | Out-of-plane Cr translation + Out-of-plane S displacement                  |
| B2         | 116.0                         | 106.1                                                     | P-S rocking motion                                                         |
| A1         | 119.0                         | 107.7                                                     | In-plane Cr translation + S shearing                                       |
| B3         | 156.9                         | 142.0                                                     | Out-of-plane Cr translation + Out-of-plane S displacement                  |
| A2         | 170.7                         | 162.9                                                     | In-plane P-S translation                                                   |
| A3         | 179.9                         | 172.9                                                     | Out-of-plane P-S motion                                                    |
| A4         | 217.3                         | 207.8                                                     |                                                                            |
| B4         | 233.2                         | 225.3                                                     | In-plane Cr translation + P translation + Out-of-plane S motion            |
| B5         | 258.3                         | 249.8                                                     | In-plane S shearing                                                        |
| A5         | 269.4                         | 259.2                                                     | In-plane Cr translation + P translation+ In-plane and Out-of-plane motion  |
| B6         | 300.1                         | 294.3                                                     | Cr motion + S In-plane counter motion                                      |
| A6         | 307.5                         | 296.2                                                     | In-plane Cr translation + S scissoring                                     |
| A7         | 325.0                         | 310.9                                                     | In-plane Cr translation + In-plane S shearing + Out-of-plane P translation |
| B7         | 350.3                         | 342.9                                                     | Out-of-plane Cr translation + S In-plane motion                            |

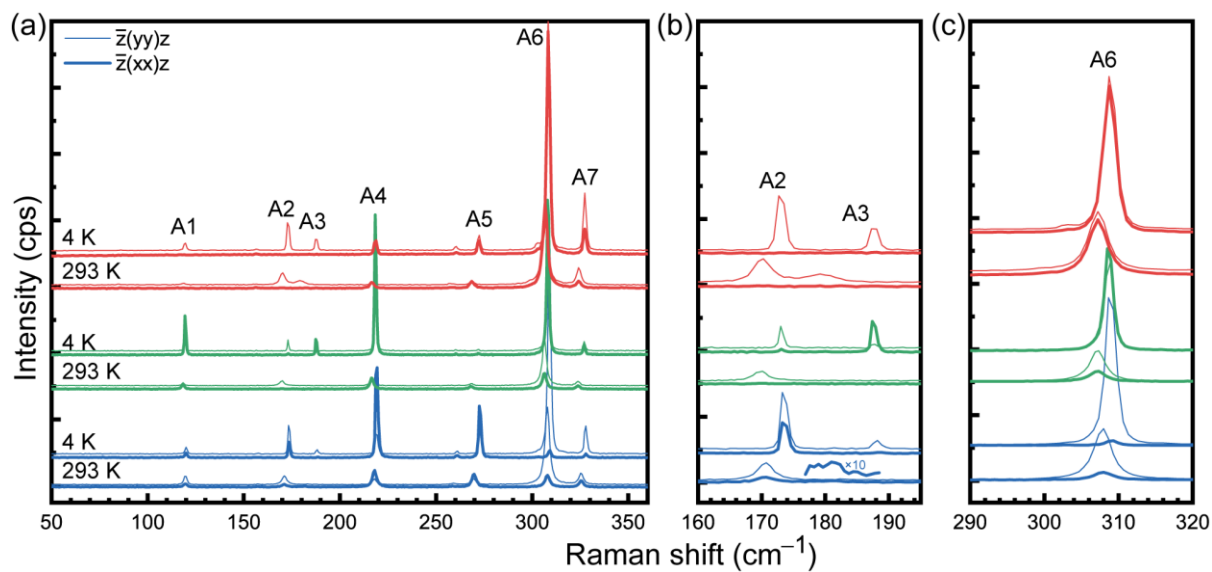

**Figure S2.** Raman spectra of bulk CrPS<sub>4</sub> with three different excitations: 1.96-eV (red), 2.41-eV (green) and 2.71-eV (blue) excitations in  $[\bar{z}(xx)z]$  (thick lines) and  $[\bar{z}(yy)z]$  (thin lines) polarization configurations at 293 and 4 K.

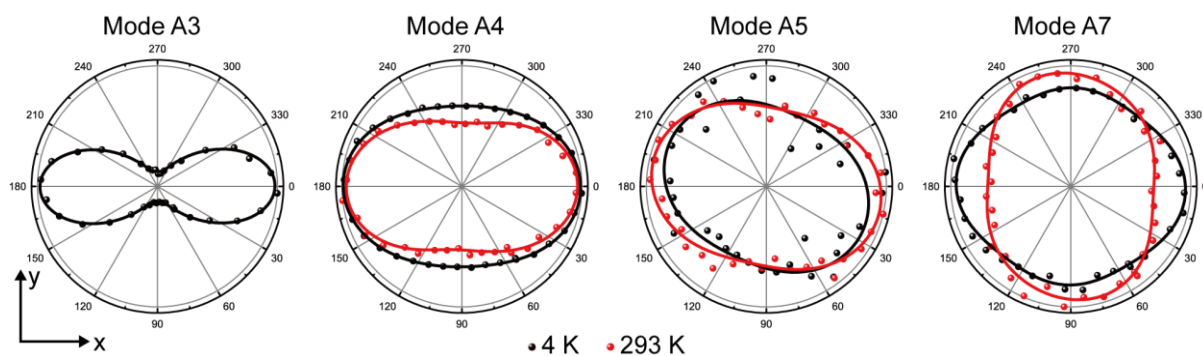

**Figure S3.** Polarization dependences of A modes in CrPS<sub>4</sub> at 4 K (black) and 293 K (red). The dots and lines are experimental data and fitting, respectively. These data were collected with the 2.41-eV excitation.

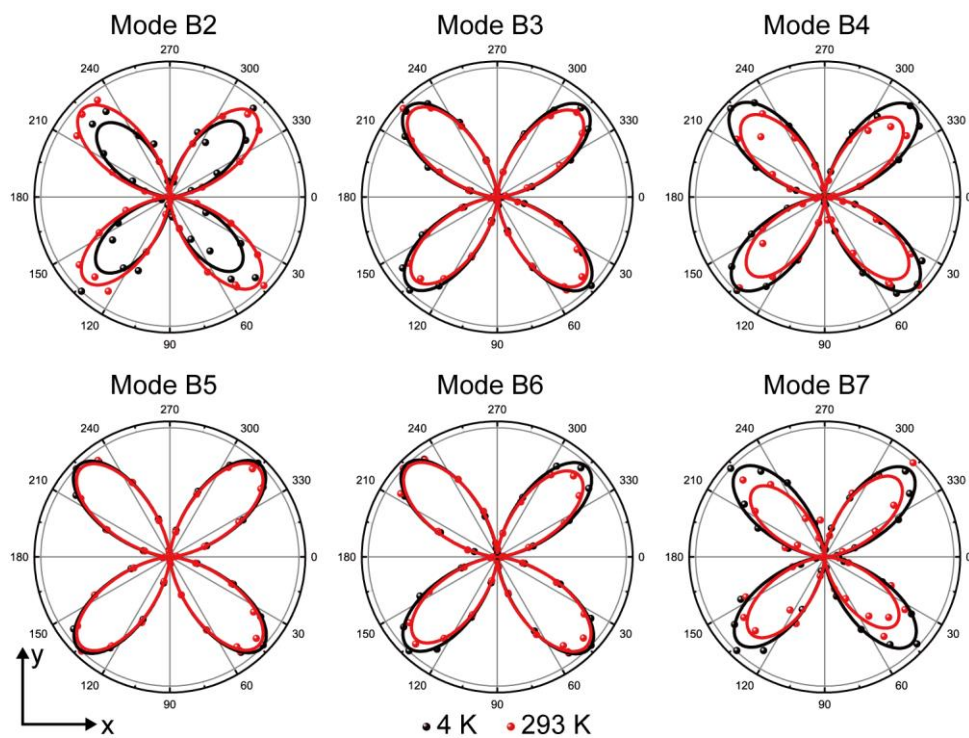

**Figure S4.** Polarization dependences of the B modes in CrPS<sub>4</sub> at 4 K (black) and 293 K (red). The dots and lines are experimental data and fitting, respectively. These data were collected with the 2.41-eV excitation.

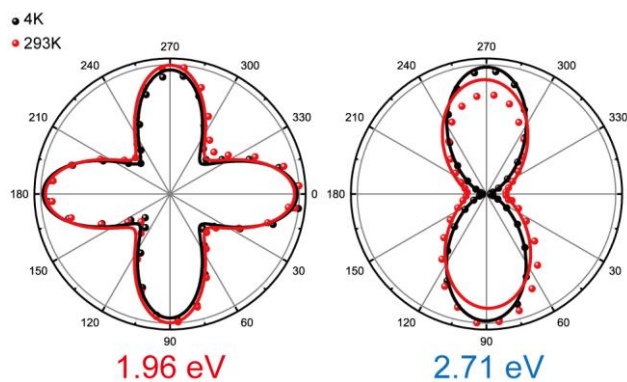

**Figure S5.** Polarization dependences of the A6 mode of a bulk CrPS<sub>4</sub> sample at 4 K (black) and 293 K (red) measured with 1.96-eV and 2.71-eV excitations, respectively. The dots and lines are experimental data and fitting, respectively.

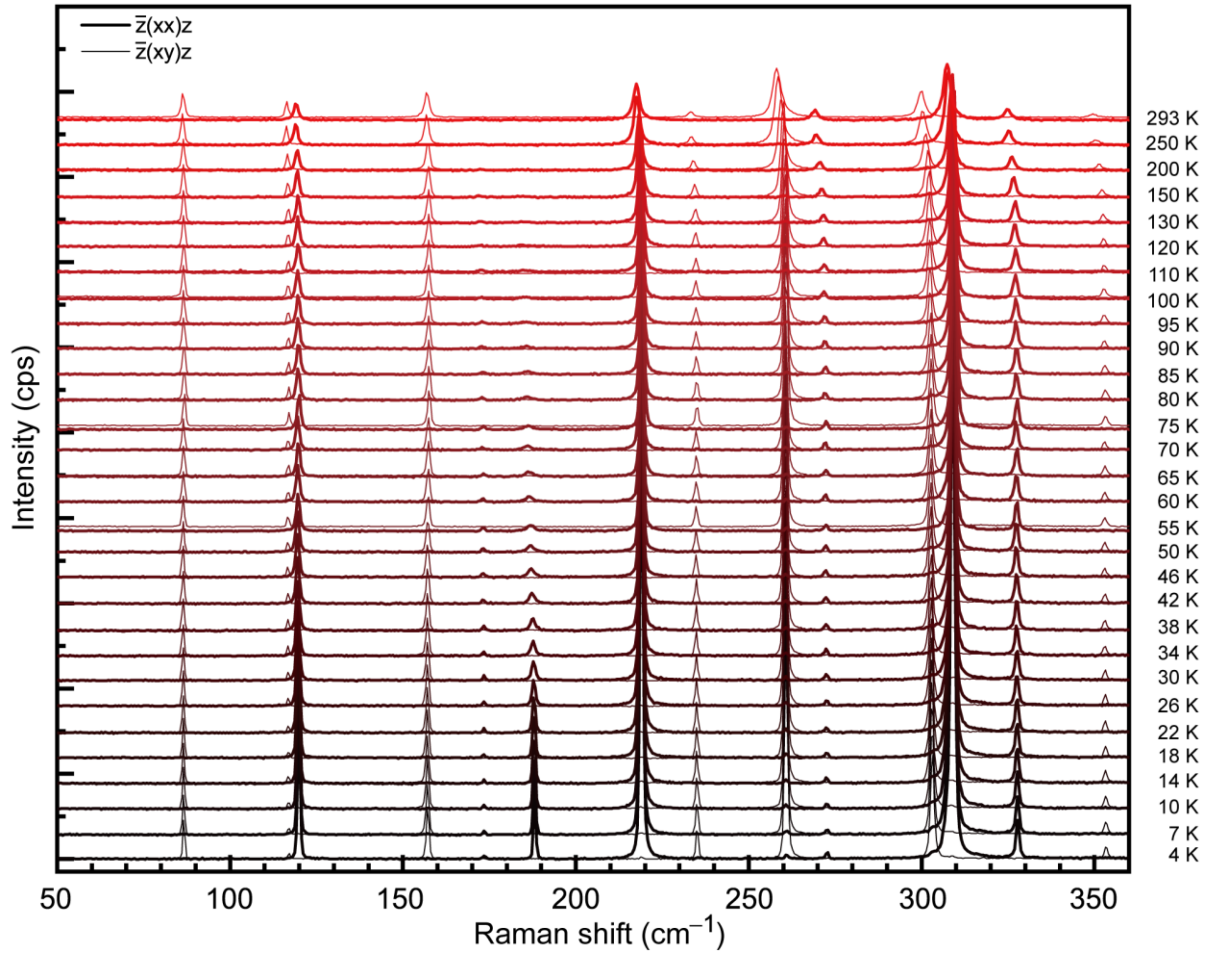

**Figure S6.** Temperature dependence of Raman spectra of a bulk sample, measured with the 2.41-eV excitation in the parallel [ $\bar{z}(xx)z$ ] (thick lines) and cross [ $\bar{z}(xy)z$ ] (thin lines) polarization configurations.

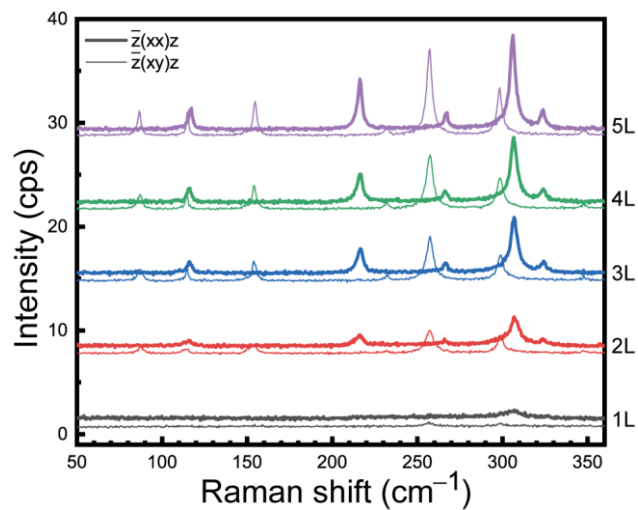

**Figure S7.** Raman spectra of few-layer CrPS<sub>4</sub> samples at 293 K, measured with the 2.41 eV-excitation in the parallel [ $\bar{z}(xx)z$ ] (thick lines) and cross [ $\bar{z}(xy)z$ ] (thin lines) polarization configurations.

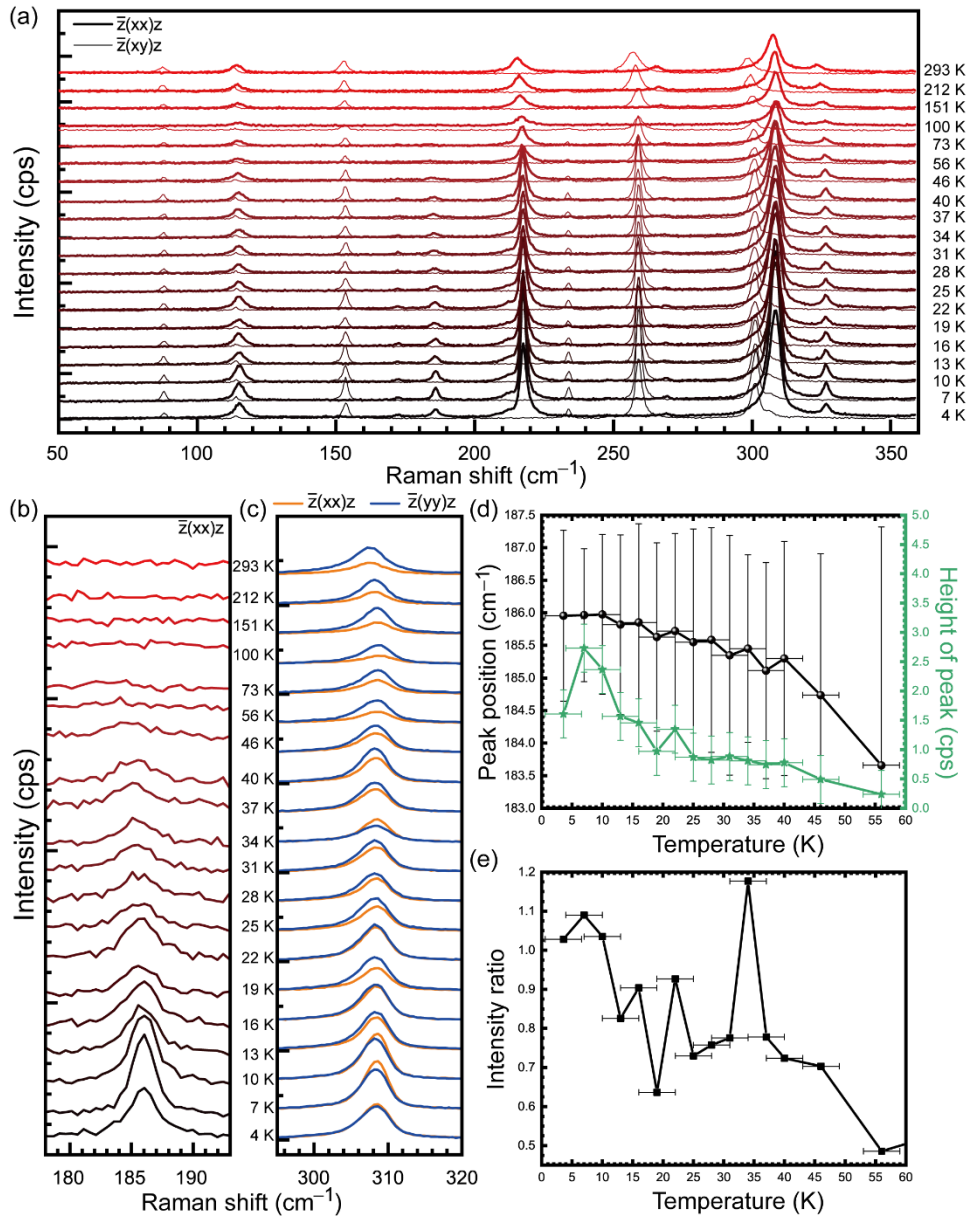

**Figure S8.** (a) Temperature dependence of Raman spectra of a 2L CrPS<sub>4</sub> sample in the parallel  $[\bar{z}(xx)z]$  (thick lines) and cross  $[\bar{z}(xy)z]$  (thin lines) polarization configurations. (b) Temperature dependence of the A<sub>3</sub> mode of a 2L sample. (c) Temperature dependence of the A<sub>6</sub> mode of a 2L sample for two different polarizations of  $[\bar{z}(xx)z]$  (orange) and  $[\bar{z}(yy)z]$  (blue). The Raman spectra were recorded with the 2.41-eV excitation. (d) Temperature dependence of the peak position (black) and the height (green) extracted from (b). (e) Temperature dependence of the intensity ratio of the two polarizations in (c). The error bars indicate the experimental uncertainties.



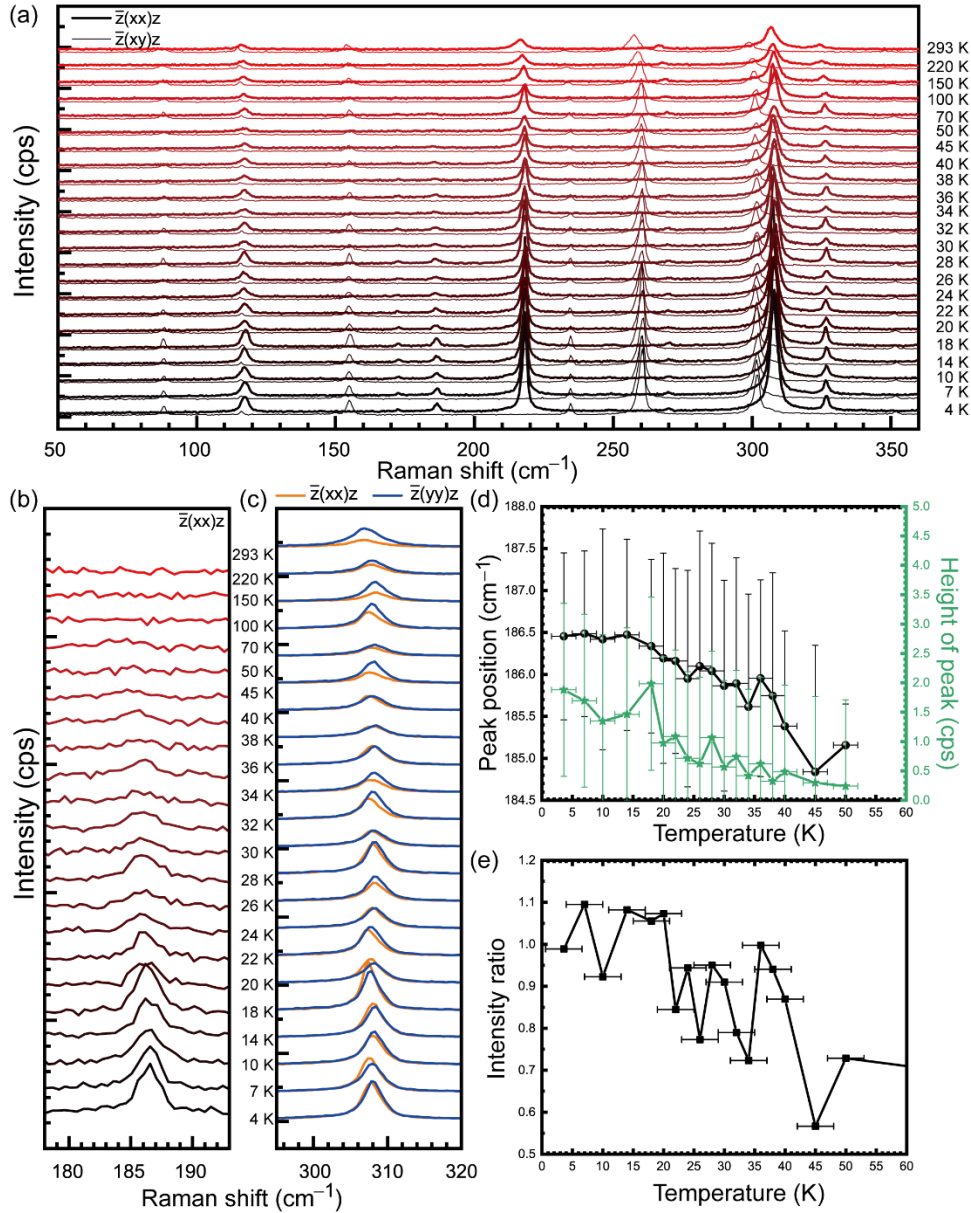

**Figure S9.** (a) Temperature dependence of Raman spectra of a 3L CrPS<sub>4</sub> sample in the parallel [ $\bar{z}(xx)z$ ] (thick lines) and cross [ $\bar{z}(xy)z$ ] (thin lines) polarization configurations. (b) Temperature dependence of the A3 mode of a 3L sample. (c) Temperature dependence of the A6 mode of a 3L sample for two different polarizations of [ $\bar{z}(xx)z$ ] (orange) and [ $\bar{z}(yy)z$ ] (blue). The Raman spectra were recorded with the 2.41-eV excitation. (d) Temperature dependence of the peak position (black) and the height (green) extracted from (b). (e) Temperature dependence of the intensity ratio of the two polarizations in (c). The error bars indicate the experimental uncertainties.

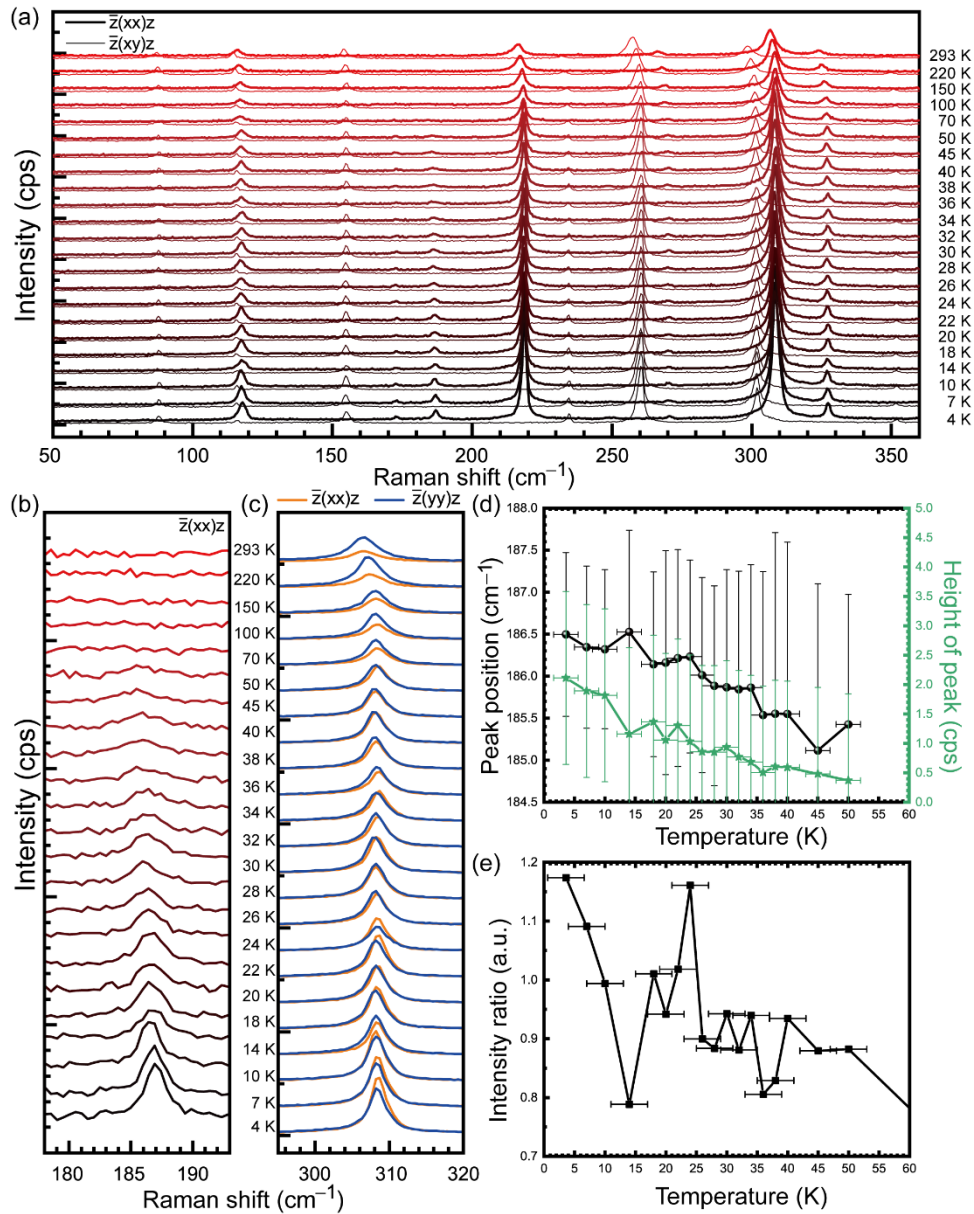

**Figure S10.** (a) Temperature dependence of Raman spectra of a 4L CrPS<sub>4</sub> sample in the parallel [ $\bar{z}(xx)z$ ] (thick lines) and cross [ $\bar{z}(xy)z$ ] (thin lines) polarization configurations. (b) Temperature dependence of the A3 mode of a 4L sample. (c) Temperature dependence of the A6 mode of a 4L sample for two different polarizations of [ $\bar{z}(xx)z$ ] (orange) and [ $\bar{z}(yy)z$ ] (blue). The Raman spectra were recorded with the 2.41-eV excitation. (d) Temperature dependence of the peak position (black) and the height (green) extracted from (b). (e) Temperature dependence of the intensity ratio of the two polarizations in (c). The error bars indicate the experimental uncertainties.

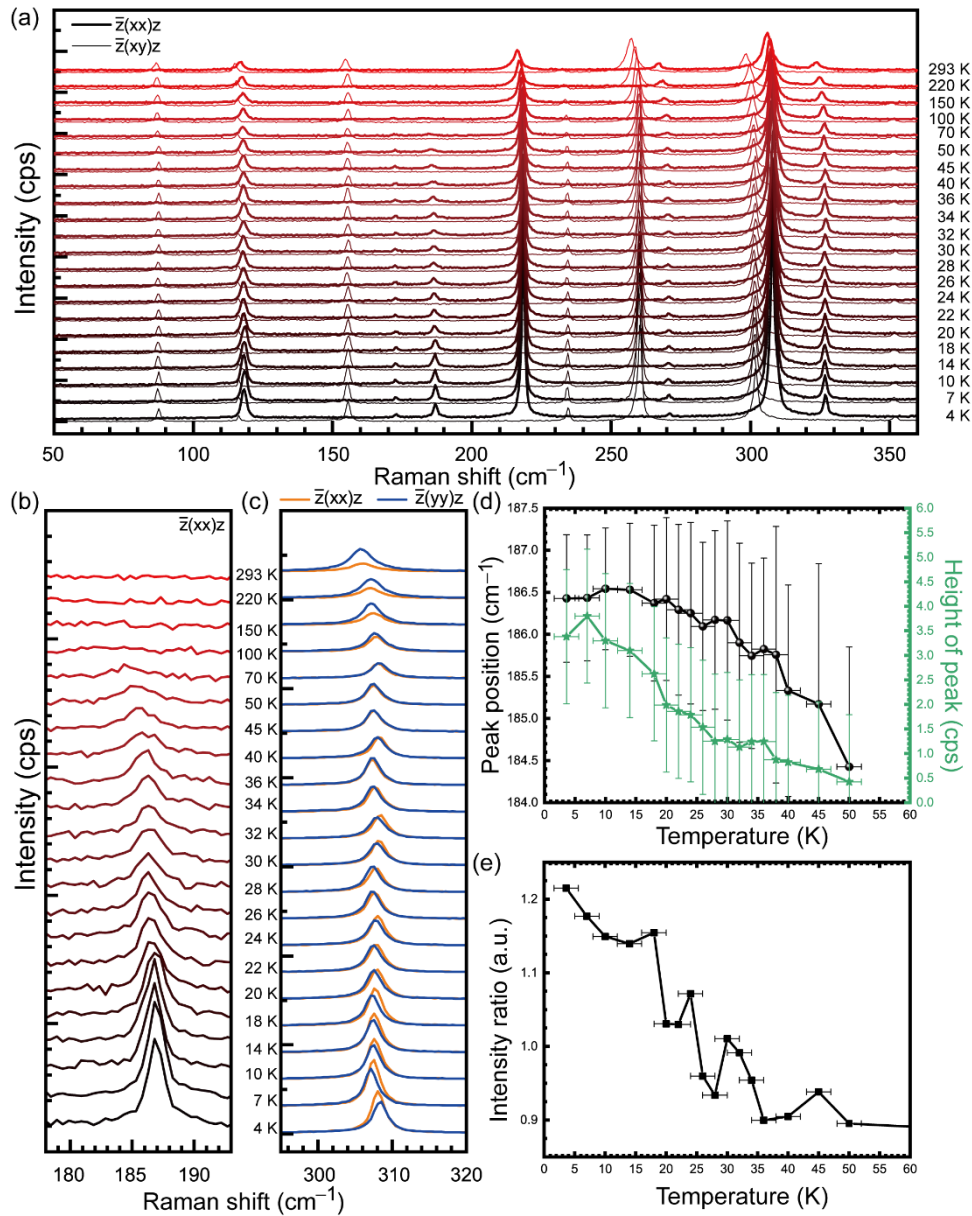

**Figure S11.** (a) Temperature dependence of Raman spectra of a 5L CrPS<sub>4</sub> sample in the parallel [ $\bar{z}(xx)z$ ] (thick lines) and cross [ $\bar{z}(xy)z$ ] (thin lines) polarization configurations. (b) Temperature dependence of the A<sub>3</sub> mode of a 5L sample. (c) Temperature dependence of the A<sub>6</sub> mode of a 5L sample for two different polarizations of [ $\bar{z}(xx)z$ ] (orange) and [ $\bar{z}(yy)z$ ] (blue). The Raman spectra were recorded with the 2.41-eV excitation. (d) Temperature dependence of the peak position (black) and the height (green) extracted from (b). (e) Temperature dependence of the intensity ratio of the two polarizations in (c). The error bars indicate the experimental uncertainties.

**Table S2.** Raman peak frequency ( $\text{cm}^{-1}$ ) of few-layer CrPS4 samples that were recorded with 2.41-eV excitation at 293 K in our work and comparison with a previous report.

| Our work   |       |       |       |       | Work by Lee <i>et al.</i> <sup>2</sup> |       |       |       |       |
|------------|-------|-------|-------|-------|----------------------------------------|-------|-------|-------|-------|
| Peak label | 2L    | 3L    | 4L    | 5L    | Peak label                             | 2L    | 3L    | 4L    | 5L    |
| B1         | 87.3  | 87.3  | 87.0  | 86.6  | --                                     | --    | --    | --    | --    |
| B2         | 113.7 | 114.7 | 114.5 | 114.9 | --                                     | --    | --    | --    | --    |
| A1         | 115.1 | 116.1 | 116.0 | 116.7 | A                                      | 112.7 | 114.7 | 115.6 | 116.7 |
| B3         | 153.4 | 154.1 | 154.1 | 154.6 | B                                      | 151.0 | 153.3 | 154.5 | 155.7 |
| A2         | 169.8 | 169.8 | 169.7 | 169.7 | C                                      | 171.6 | 169.4 | 169.7 | 170.3 |
| A3         | --    | --    | --    | --    | --                                     | --    | --    | --    | --    |
| A4         | 216.0 | 216.4 | 216.3 | 216.2 | D                                      | 215.4 | 215.6 | 215.9 | 216.4 |
| B4         | 231.9 | 232.2 | 232.0 | 232.1 | E                                      | 230.2 | 231.6 | 232.1 | 232.3 |
| B5         | 257.2 | 257.4 | 257.3 | 257.1 | F                                      | 256.9 | 256.7 | 256.9 | 257.4 |
| A5         | 265.9 | 266.5 | 266.3 | 266.9 | G                                      | 263.5 | 265.6 | 266.6 | 267.6 |
| B6         | 298.9 | 298.9 | 298.6 | 298.3 | H                                      | 297.9 | 297.7 | 298.3 | 298.9 |
| A6         | 307.0 | 307.0 | 306.5 | 305.8 | I                                      | 306.5 | 306.0 | 306.1 | 306.7 |
| A7         | 324.0 | 324.0 | 323.6 | 323.5 | J                                      | 323.1 | 323.2 | 323.4 | 323.8 |
| B7         | 347.4 | 347.8 | 347.8 | 347.9 | K                                      | 346.7 | 347.4 | 347.8 | 348.6 |

**Table S3.** Raman peak linewidth ( $\text{cm}^{-1}$ ) of few-layer CrPS<sub>4</sub> samples that were recorded with 2.41-eV excitation at 293 K in our work and comparison with a previous report.

| Our work   |     |     |     |     | Work by J.Lee <i>et al.</i> <sup>2</sup> |      |     |     |     |
|------------|-----|-----|-----|-----|------------------------------------------|------|-----|-----|-----|
| Peak label | 2L  | 3L  | 4L  | 5L  | Peak label                               | 2L   | 3L  | 4L  | 5L  |
| B1         | 3.5 | 3.4 | 3.1 | 2.3 | --                                       | --   | --  | --  | --  |
| B2         | 4.5 | 1.7 | 1.6 | 1.4 | --                                       | --   | --  | --  | --  |
| A1         | 6.8 | 3.3 | 3.0 | 2.6 | A                                        | 6.5  | 4.9 | 5.6 | 6.1 |
| B3         | 5.5 | 2.9 | 2.8 | 2.6 | B                                        | 7.0  | 4.7 | 4.5 | 3.8 |
| A2         | 2.9 | 3.1 | 3.2 | 2.8 | C                                        | 8.2  | 5.2 | 5.0 | 4.6 |
| A3         | --  | --  | --  | --  | --                                       | --   | --  | --  | --  |
| A4         | 5.6 | 4.3 | 4.1 | 3.3 | D                                        | 14.7 | 5.7 | 5.1 | 5.2 |
| B4         | 2.1 | 2.7 | 2.3 | 2.3 | E                                        | 7.3  | 5.3 | 5.8 | 5.2 |
| B5         | 5.6 | 4.8 | 4.7 | 3.9 | F                                        | 10.8 | 6.3 | 5.7 | 5.3 |
| A5         | 2.9 | 2.9 | 3.1 | 2.5 | G                                        | 3.5  | 3.9 | 4.4 | 4.2 |
| B6         | 5.0 | 4.4 | 4.5 | 3.6 | H                                        | 9.9  | 6.7 | 5.9 | 5.0 |
| A6         | 4.8 | 4.9 | 4.9 | 3.9 | I                                        | 9.1  | 6.3 | 5.6 | 5.0 |
| A7         | 2.9 | 2.8 | 3.1 | 2.8 | J                                        | 4.7  | 4.5 | 5.3 | 3.7 |
| B7         | 1.8 | 0.9 | 3.1 | 3.6 | K                                        | 3.9  | 3.0 | 4.2 | 5.1 |

## References

- 1 S. N. Neal, K. R. O’Neal, A. V Haglund, D. G. Mandrus, H. A. Bechtel, G. L. Carr, K. Haule, D. Vanderbilt, H.-S. Kim and J. L. Musfeldt, *2D Mater.*, 2021, **8**, 035020.
- 2 J. Lee, T. Y. Ko, J. H. Kim, H. Bark, B. Kang, S.-G. Jung, T. Park, Z. Lee, S. Ryu and C. Lee, *ACS Nano*, 2017, **11**, 10935–10944.
